# Supplementary material
Source: Springer Nature journal article supplement (http://www.springermedizin.de/resource/supplementary/12885_2012_3408_MOESM5_ESM.pdf/9463278)

**A**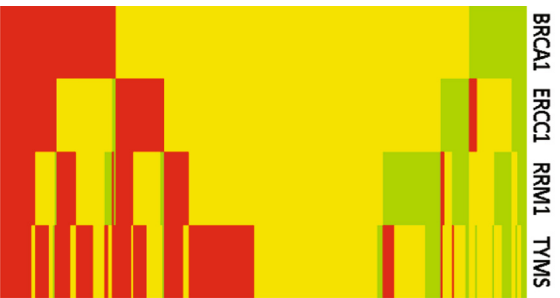**B**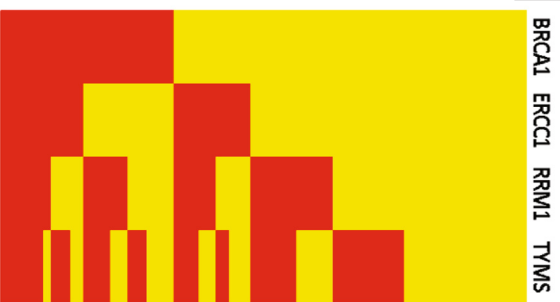**C**

Normal and aberrant B, E, R, T mRNA expression in NSCLC tumors

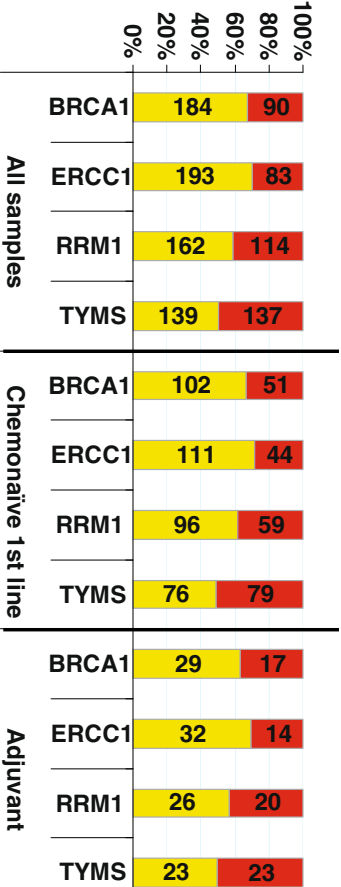

Supplement: MOESM5 [file 9463278]
